# Supplementary material for: Colicin-Mediated Transport of DNA through the Iron Transporter FepA
Source: PubMed Central journal article supplement (PMC8546555; doi:10.1128/mbio.01787-21), 2021-09-21

**A***In vitro*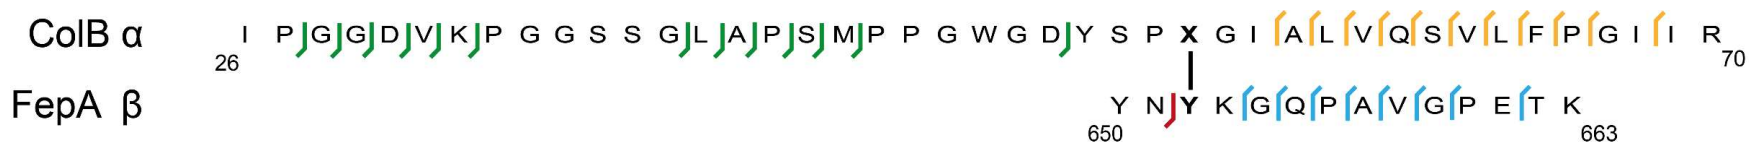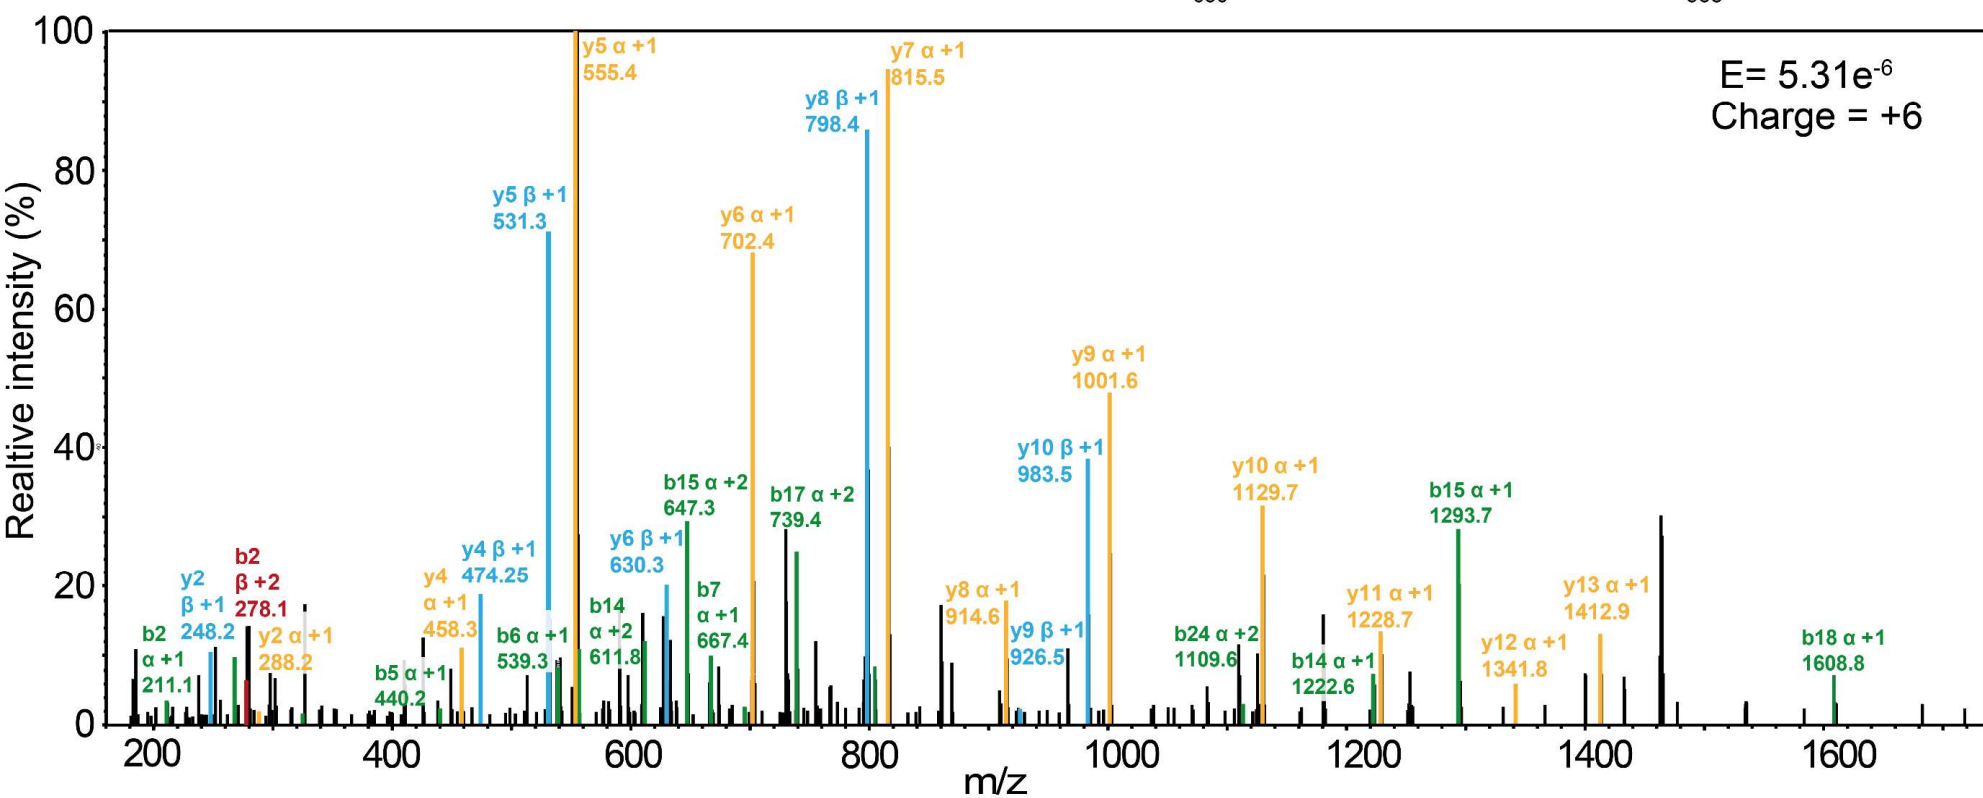

*In vitro*

**B**

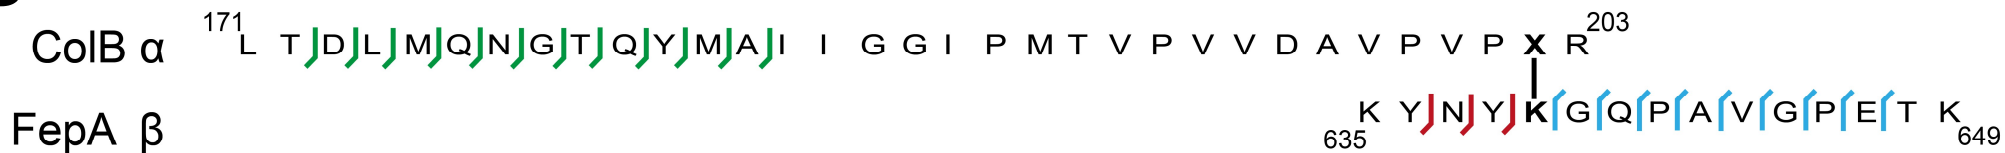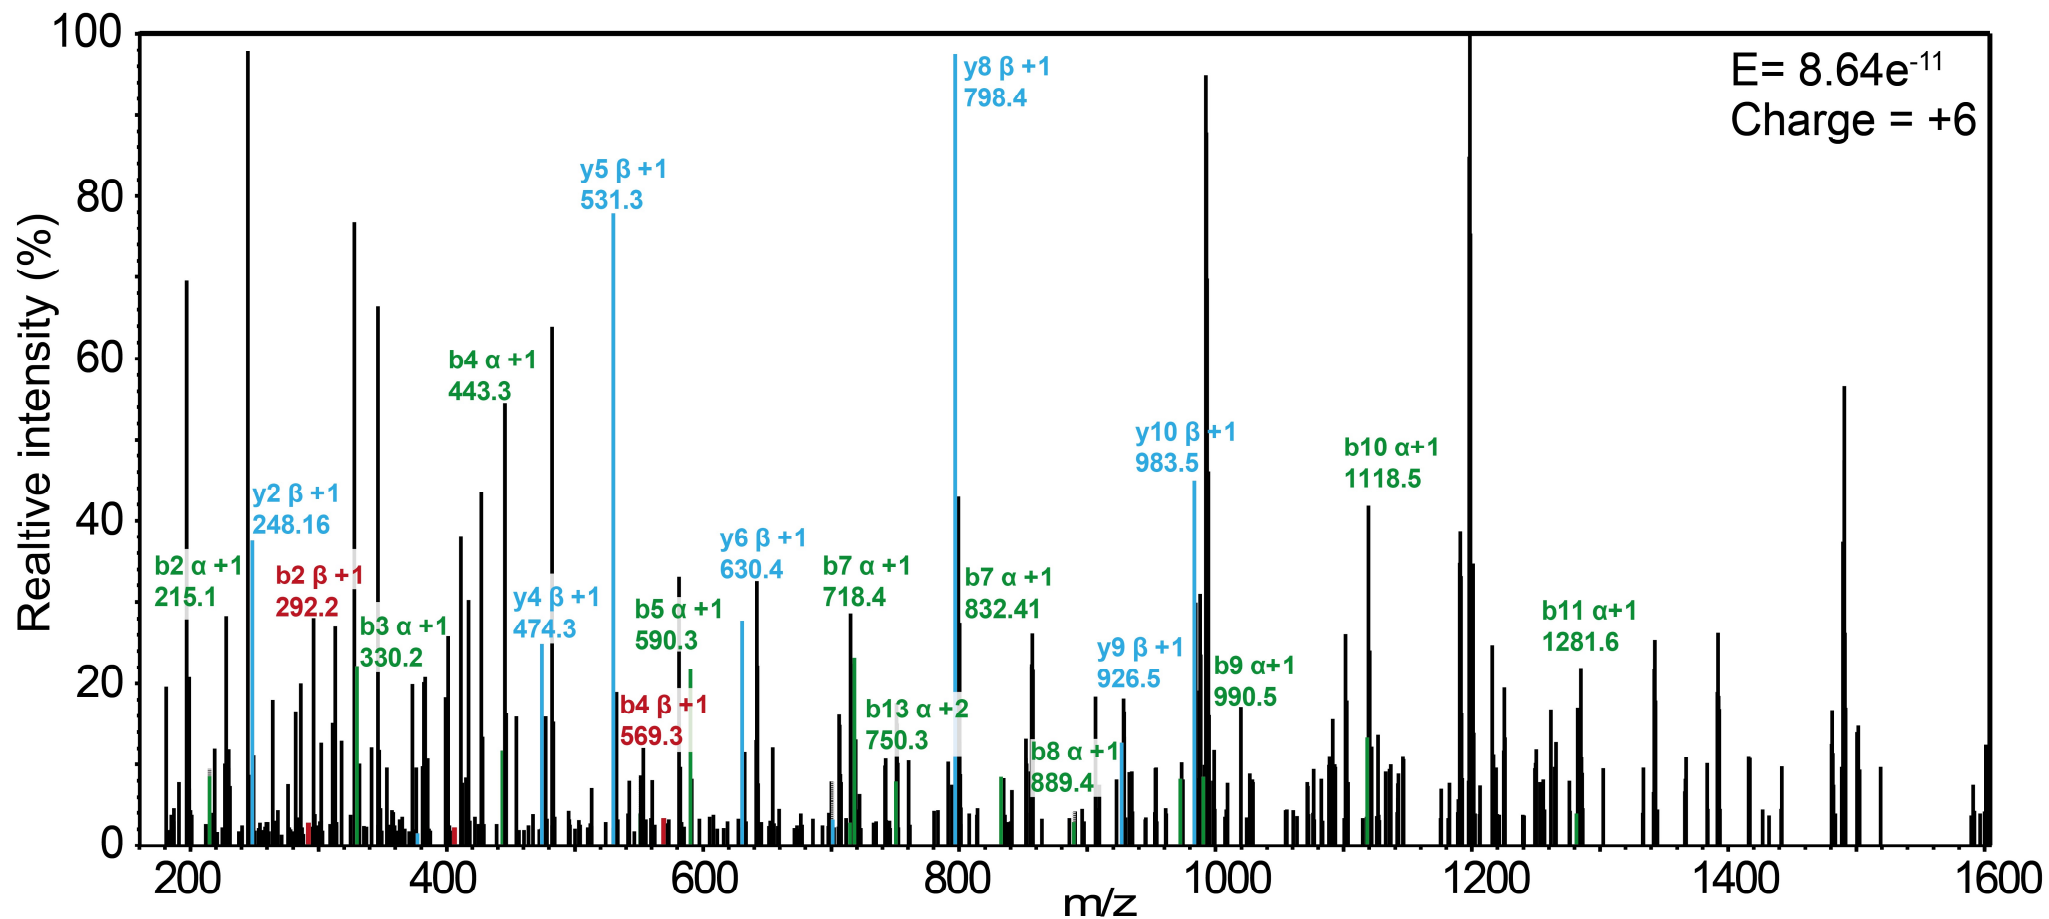

**C***In vitro*ColB  $\alpha$ 

204 S X P G T N I J K D V Y S A P V S P N L P D L V L S V G Q M N T P V R 237

FepA  $\beta$ 

635 K Y J N J Y K J G Q P A V G P E T K 649

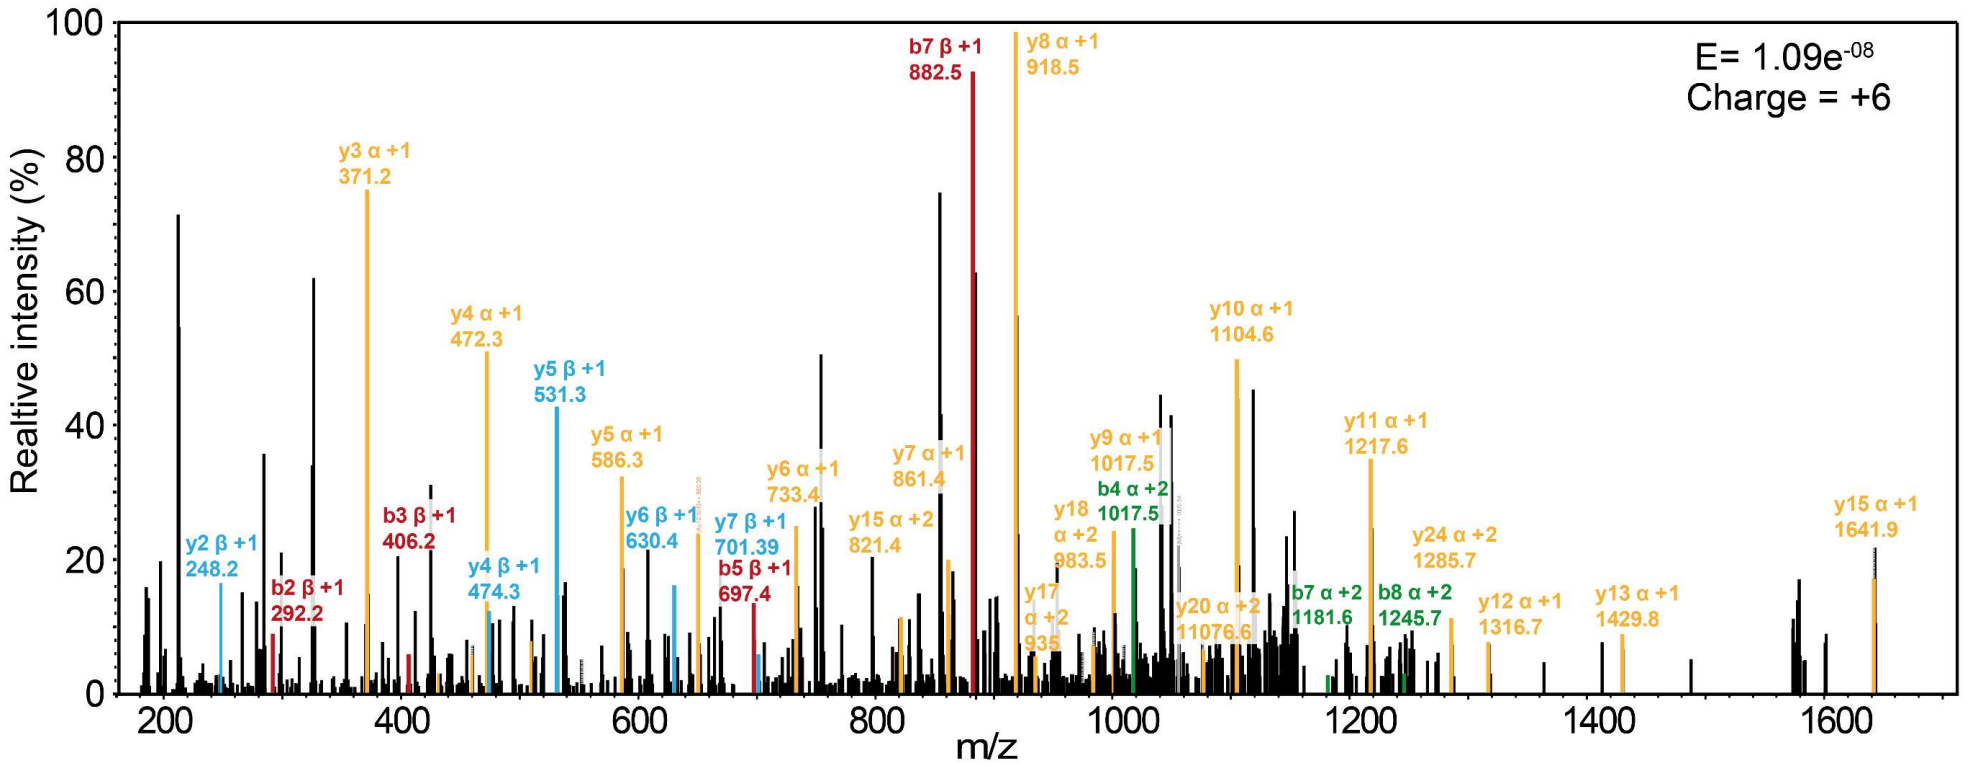

**D***In vivo*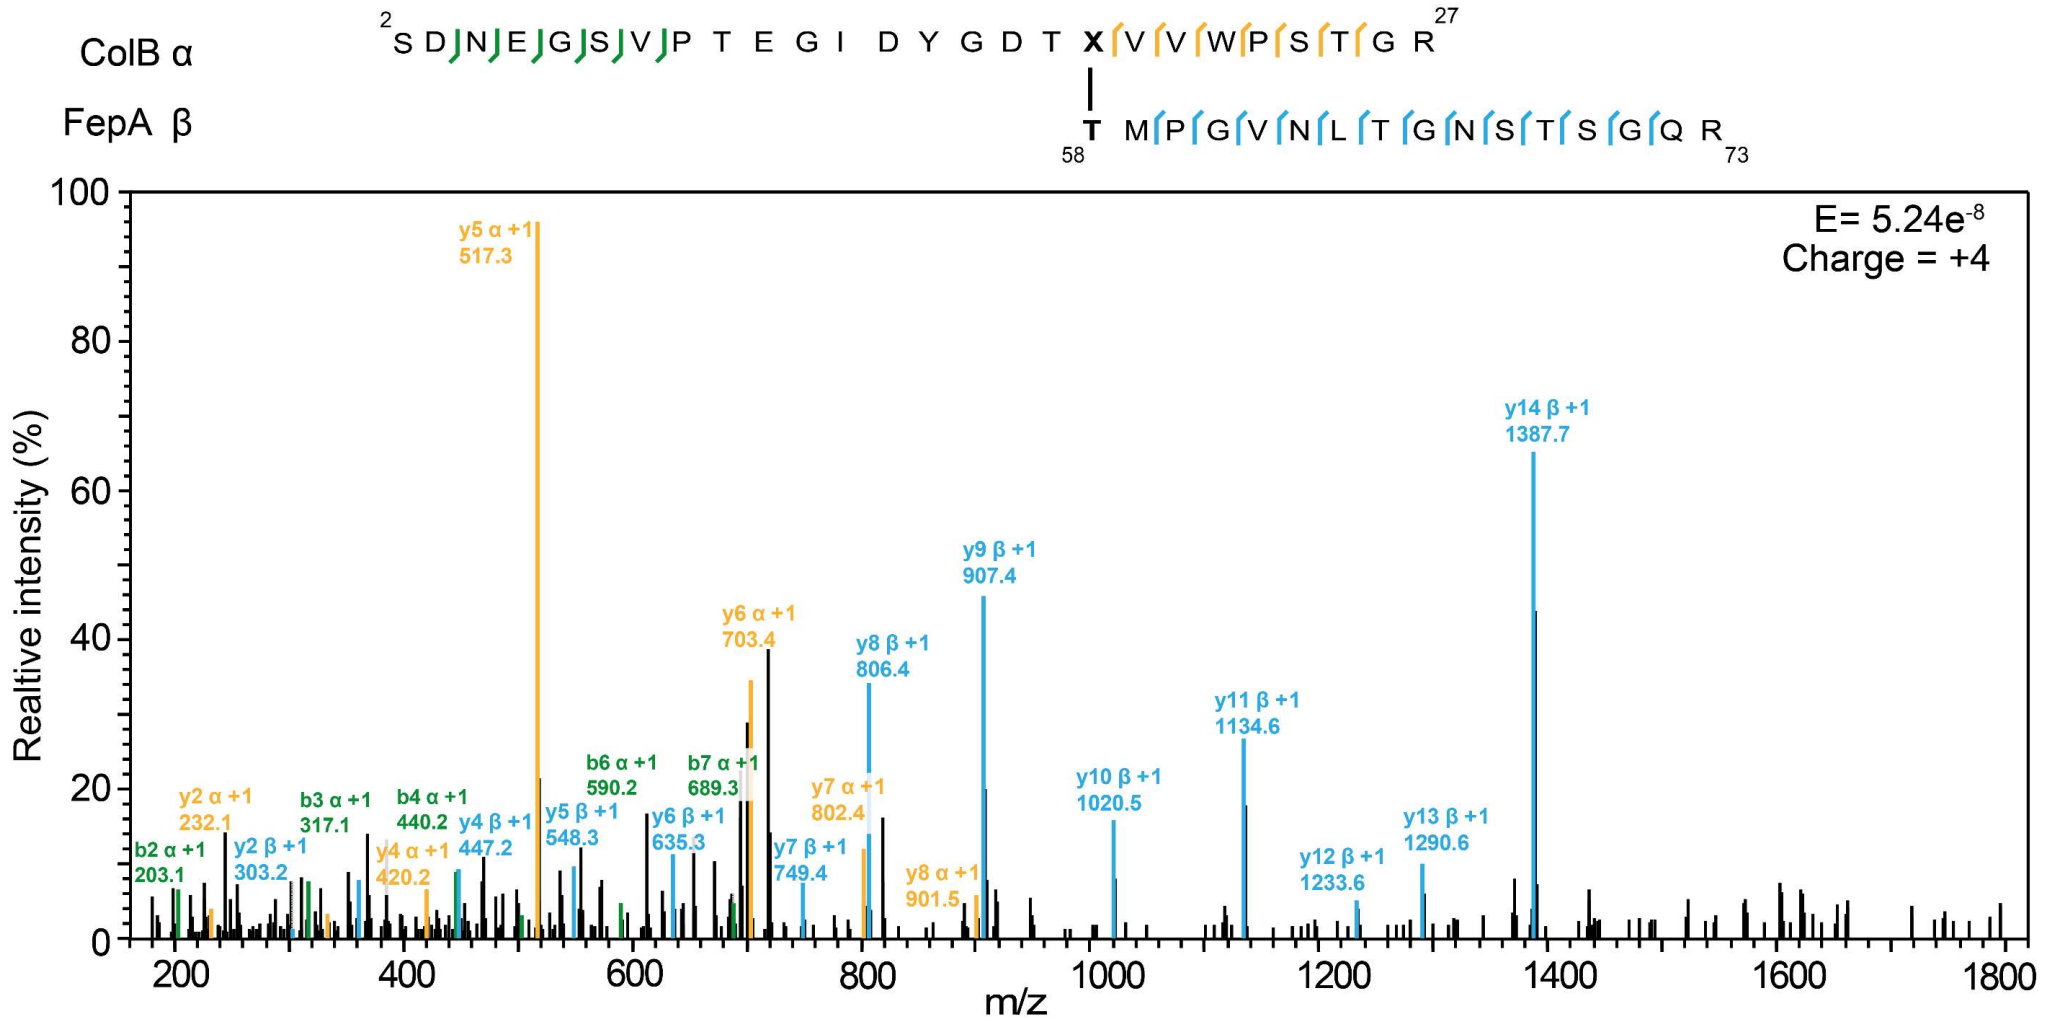

**E***In vivo*ColB  $\alpha$  <sup>77</sup> E L E E X D W S G W S V S V H S P W G N E K <sup>98</sup>FepA  $\beta$  214 A G T Y A T T L P A G R 225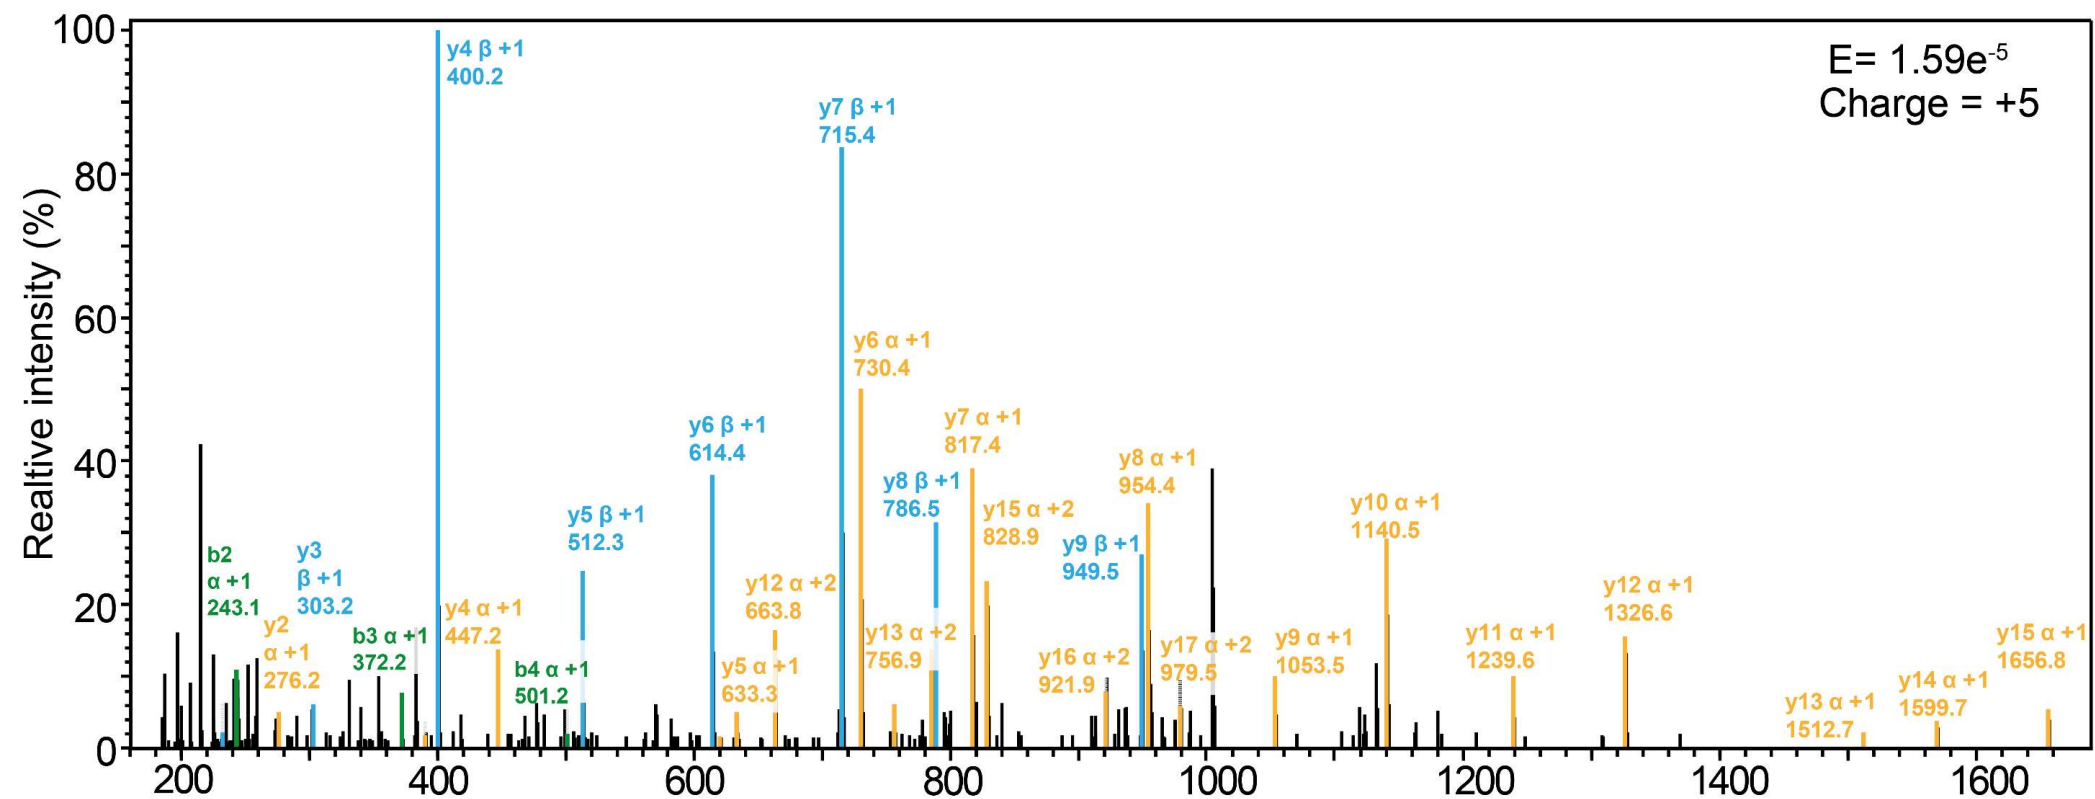

Supplement: mbio.01787-21-sf003.pdf [file mbio.01787-21-sf003.pdf]
