# Supplementary material for: Colicin-Mediated Transport of DNA through the Iron Transporter FepA
Source: PubMed Central journal article supplement (PMC8546555; doi:10.1128/mbio.01787-21), 2021-09-21
Supplement: mbio.01787-21-sf004.pdf [file mbio.01787-21-sf004.pdf]

**A**

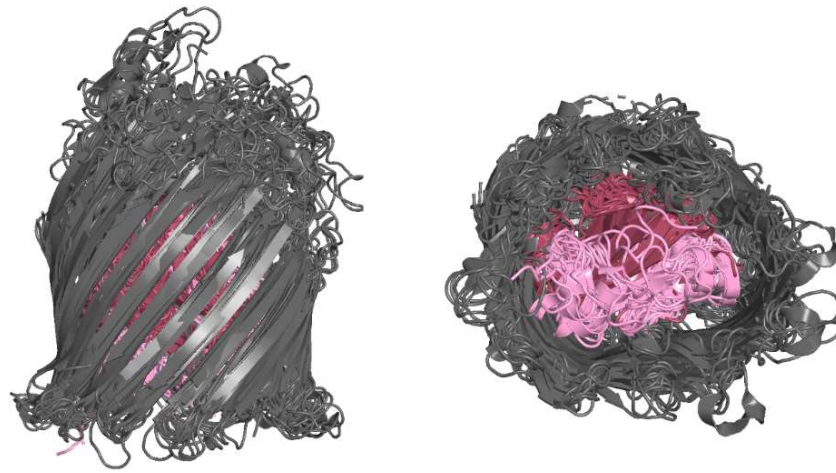

| PDB  | RMSD | Protein | Description                                                  | Origin                     |
|------|------|---------|--------------------------------------------------------------|----------------------------|
| 1FEP | 0    | FepA    | Siderophore transporter                                      | Escherichia coli           |
| 5MZS | 1.23 | PfepA   | Siderophore transporter                                      | Pseudomonas aeruginosa     |
| 5FR8 | 1.96 | PirA    | Siderophore transporter                                      | Acinetobacter meningitidis |
| 1QJQ | 2.57 | FhuA    | Ferric hydroxamate receptor                                  | Escherichia coli           |
| 4EPA | 3.14 | FyuA    | Ferric yersiniabactin uptake receptor                        | Yersinia pestis            |
| 1NQH | 3.19 | BtuB    | B12 Transporter                                              | Escherichia coli           |
| 1PO0 | 3.26 | FecA    | Ferric citrate transporter in complex with iron-free citrate | Escherichia coli           |
| 2HDI | 3.41 | Cir     | Colicin I receptor Cir in complex with RBD of Colicin Ia     | Escherichia coli           |
| 3FHH | 3.41 | ShuA    | Heme/Hemoglobin outer membrane transporter                   | Shigella dysenteriae       |
| 4AIP | 3.48 | FrpB    | Iron transporter                                             | Neisseria meningitidis     |
| 4RDT | 3.62 | ZnuD    | Zn-transporter                                               | Neisseria meningitidis     |
| 1XKW | 3.85 | FptA    | Pyochelin outer membrane receptor                            | Pseudomonas aeruginosa     |
| 2IAH | 3.93 | FpvA    | Ferripyoverdine receptor bound to substrate                  | Pseudomonas aeruginosa     |

**B**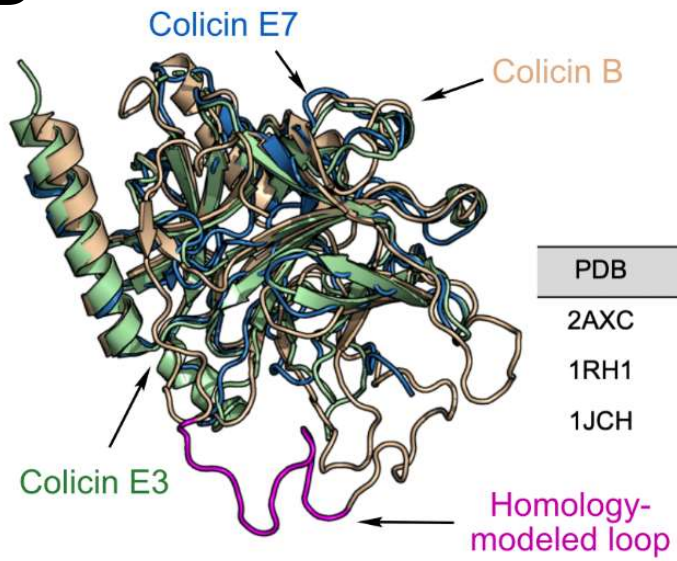

| PDB  | RMSD | Protein    | Description                      | Origin           |
|------|------|------------|----------------------------------|------------------|
| 2AXC | 0    | Colicin E7 | N'-terminal translocation domain | Escherichia coli |
| 1RH1 | 2.38 | Colicin B  | N'-terminal translocation domain | Escherichia coli |
| 1JCH | 9.42 | Colicin E3 | N'-terminal translocation domain | Escherichia coli |
