# Supplementary material for: Colicin-Mediated Transport of DNA through the Iron Transporter FepA
Source: PubMed Central journal article supplement (PMC8546555; doi:10.1128/mbio.01787-21), 2021-09-21

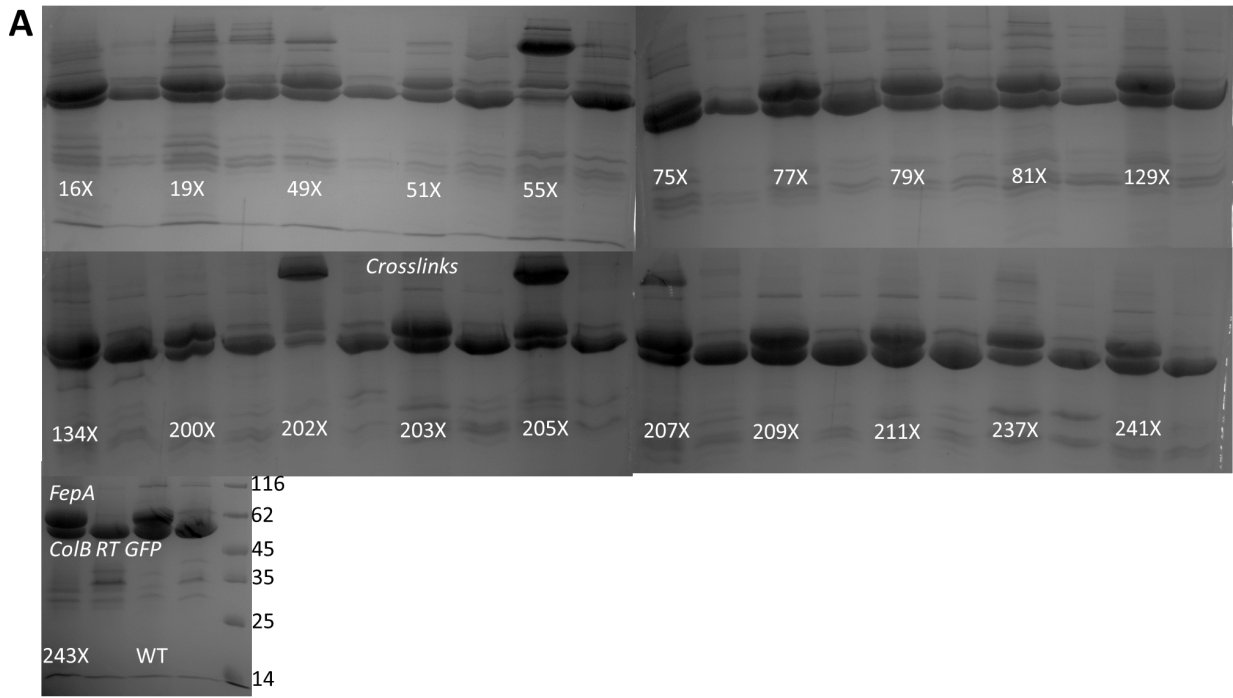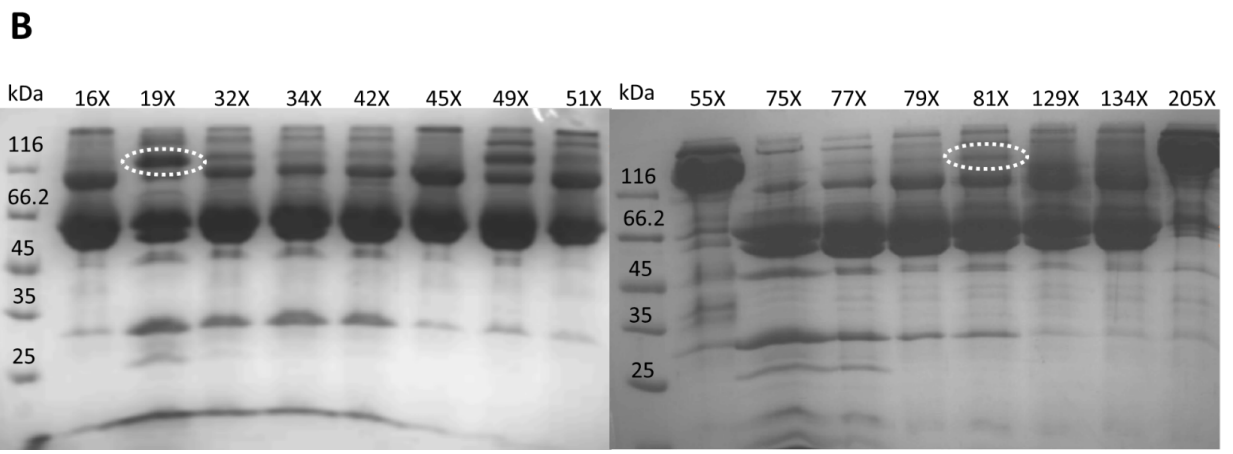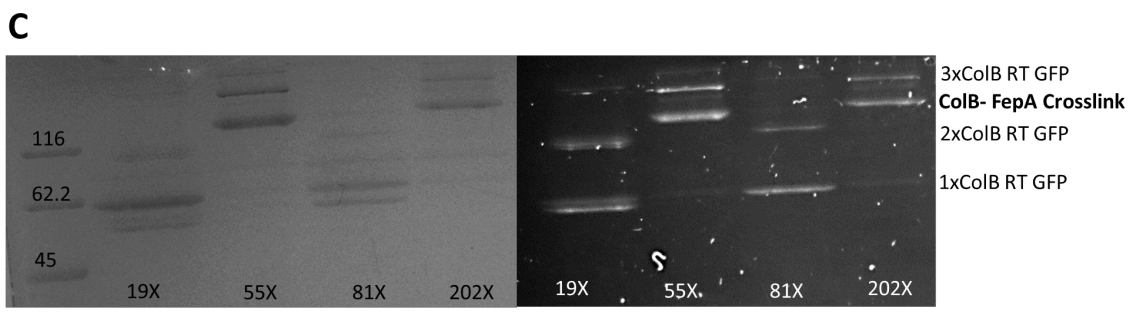

Supplement: mbio.01787-21-sf006.pdf [file mbio.01787-21-sf006.pdf]
